# Supplementary material for: Unprecedented 3D polycatenation based on ribbons of rings found in two metallosupramolecular polymers whose open frameworks show reversible collapse upon de- and rehydration
Source: Royal Society of Chemistry journal article supplement (doi:10.1039/b810523p), 2008-01-01
Supplement: b810523p.pdf [file b810523p.pdf]

## Supporting materials

### Unprecedented 3D polycatenation based on ribbons of rings found in two metallosupramolecular polymers whose open frameworks show reversible collapse upon de- and rehydration

Qing-Xia Yao, Zhan-Feng Ju, Wei Li, Wei Wu, Shou-Tian Zheng and Jie Zhang\*

*State Key Laboratory of Structural Chemistry, Fujian Institute of Research on the Structure of Matter, Chinese Academy of Sciences, Fujian, Fuzhou, 350002, China.*

*Fax: 86 0591 83710051; E-mail: [zhangjie@fjirsm.ac.cn](mailto:zhangjie@fjirsm.ac.cn)*

#### Materials, Methods, Syntheses and Characterizations

1-(4-carboxybenzyl)-4,4'-bipyridinium chloride was synthesized based on the nucleophilic substitution reaction of 4,4'-bipyridine and 4-(chloromethyl)benzoic acid. Other chemicals employed for synthesis were obtained commercially. Elemental analyses of C, H and N were carried out with a Vario EL III elemental analyzer. IR spectra were performed on a Spectrum One FT-IR spectrometer with KBr pellets in the range 4000–400  $\text{cm}^{-1}$ . X-Ray powder diffraction (XRPD) data was obtained using a Rigaku DMAX 2500 powder diffractometer with Cu  $K\alpha$  radiation.

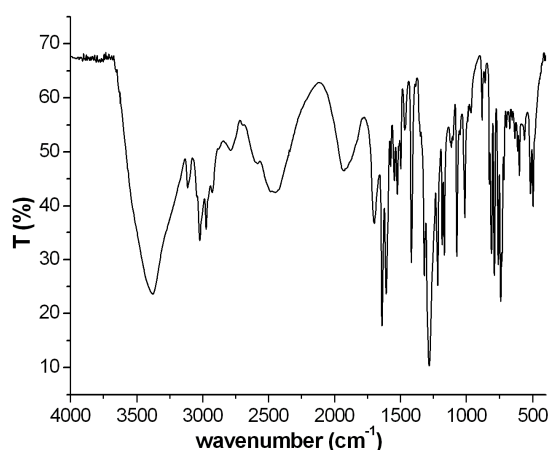

**Fig. S1.** IR spectrum of HBpybcCl salt.

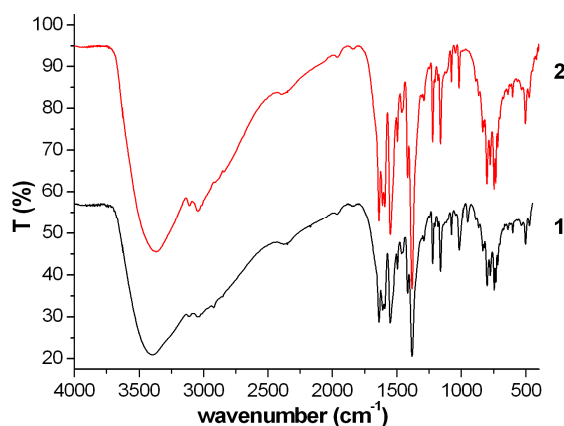

**Fig. S2.** IR spectra of 1 and 2.

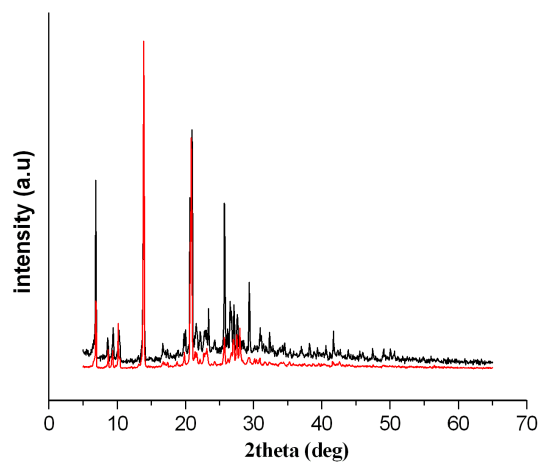

Fig. S3. Powder X-ray diffraction patterns of **1** and **2**.

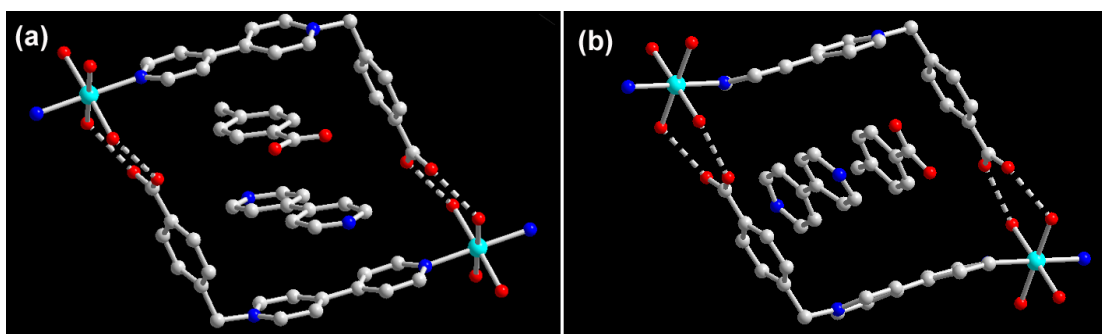

Fig. S4. Two different interpenetrating ways: bipyridinium and benzyl carboxylate groups are sandwiched between and orthogonally oriented with respect to two bipyridinium units within the rings of ribbons A (a), or two benzyl carboxylate units within the rings of ribbons B (b).

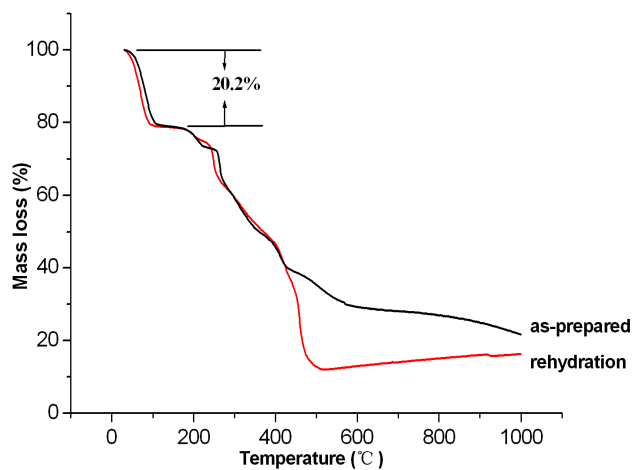

Fig. S5. TGA plots of complex **1** as the prepared material and after rehydration.

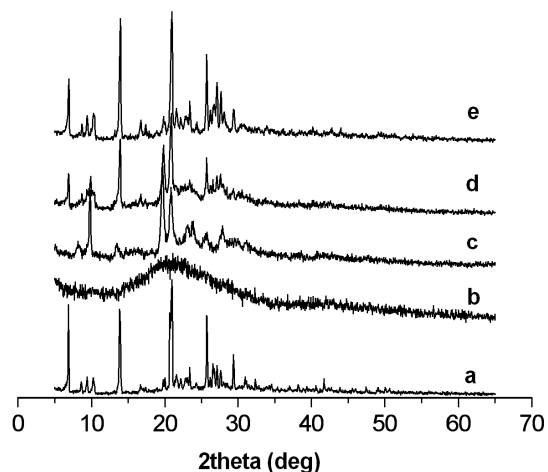

**Fig. S6.** Powder X-ray diffraction patterns of **1** measured at room temperature (from bottom to top) as the prepared material (1a), after dehydration (1b) and after rehydration in moist air for ten minutes (1c), 3 hours (1d) and 3 days (1e).

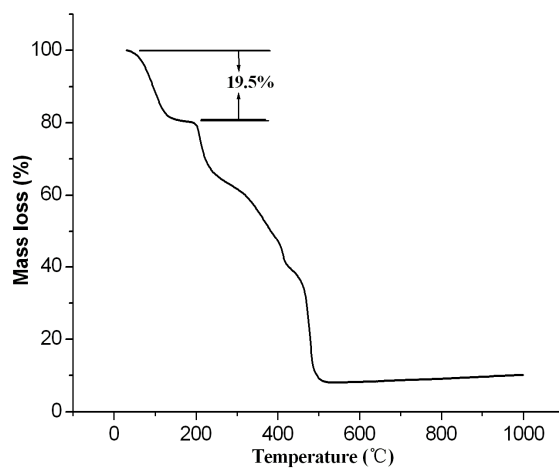

**Fig. S7.** TGA plots of complex **2**.

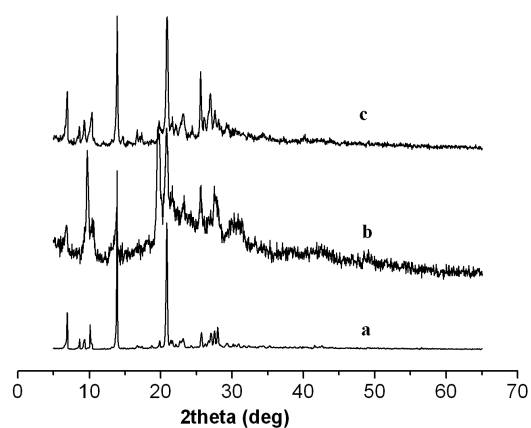

**Fig. S8.** Powder X-ray diffraction patterns of **2** measured at room temperature (from bottom to top) as the prepared material (2a), after rehydration in the ambient laboratory air for 3 days (2b) and 7 days (2c).

**Table S1.** Selected bond lengths (Å) and angles (deg) for **1**.

| Bond Lengths |            |             |            |
|--------------|------------|-------------|------------|
| Co1-N1       | 2.186(4)   | Co2-N5      | 2.162(4)   |
| Co1-N3       | 2.153(4)   | Co2-N7      | 2.167(4)   |
| Co1-O1W      | 2.071(4)   | Co2-O5W     | 2.097(4)   |
| Co1-O2W      | 2.083(4)   | Co2-O6W     | 2.068(4)   |
| Co1-O3W      | 2.080(4)   | Co2-O7W     | 2.078(4)   |
| Co1-O4W      | 2.095(4)   | Co2-O8W     | 2.086(5)   |
| Bond Angles  |            |             |            |
| N1-Co1-N3    | 179.3(2)   | N5-Co2-N7   | 179.38(18) |
| O1W-Co1-O3W  | 178.76(17) | O6W-Co2-O8W | 178.78(19) |
| O1W-Co1-O2W  | 90.51(17)  | O6W-Co2-O7W | 92.17(18)  |
| O3W-Co1-O2W  | 89.04(17)  | O8W-Co2-O7W | 87.91(18)  |
| O1W-Co1-O4W  | 90.70(18)  | O6W-Co2-O5W | 87.37(18)  |
| O2W-Co1-O4W  | 178.08(17) | O7W-Co2-O5W | 179.5(2)   |
| O3W-Co1-O4W  | 89.72(16)  | O8W-Co2-O5W | 92.55(19)  |
| O1W-Co1-N1   | 87.26(17)  | O5W-Co2-N5  | 88.19(16)  |
| O2W-Co1-N1   | 87.55(16)  | O6W-Co2-N5  | 89.63(16)  |
| O3W-Co1-N1   | 91.57(16)  | O7W-Co2-N5  | 92.09(16)  |
| O4W-Co1-N1   | 91.02(16)  | O8W-Co2-N5  | 91.59(17)  |
| O1W-Co1-N3   | 92.29(16)  | O5W-Co2-N7  | 92.43(16)  |
| O2W-Co1-N3   | 93.01(17)  | O6W-Co2-N7  | 90.45(16)  |
| O3W-Co1-N3   | 88.89(16)  | O7W-Co2-N7  | 87.29(16)  |
| O4W-Co1-N3   | 88.44(15)  | O8W-Co2-N7  | 88.34(18)  |

**Table S2.** Hydrogen-bonding parameters in **1**.

| D   | A  | Symmetry code     | d(D...A) (Å) |
|-----|----|-------------------|--------------|
| O1W | O4 | 0.5+x, -0.5+y, z  | 2.627(7)     |
| O2W | O3 | 0.5+x, -0.5+y, z  | 2.674(7)     |
| O3W | O2 | -0.5+x, 0.5+y, z  | 2.642(6)     |
| O4W | O1 | -0.5+x, 0.5+y, z  | 2.670(6)     |
| O5W | O7 | 0.5+x, 0.5+y, z   | 2.656(8)     |
| O6W | O8 | 0.5+x, 0.5+y, z   | 2.627(8)     |
| O7W | O6 | -0.5+x, -0.5+y, z | 2.614(7)     |
| O8W | O5 | -0.5+x, -0.5+y, z | 2.648(9)     |
